# Supplementary material for: Peanut allergen induces more serious allergic reactions than other allergens involving MAPK signaling pathways
Source: Royal Society of Chemistry journal article supplement (doi:10.1039/d2fo00777k), 2022-01-01
Supplement: d2fo00777k1.pdf [file d2fo00777k1.pdf]

Table 1 Prediction of protein allergenicity by AllerCatPro

| Protein          | Allergen   | Similarity to allergen and resulting predicted evidence for allergenicity |                                          |
|------------------|------------|---------------------------------------------------------------------------|------------------------------------------|
|                  |            | Result                                                                    | Comment                                  |
| Arachis hypogaea | Ara h 1    | Strong evidence                                                           | 3D epitope>93%                           |
|                  | Ara h 2    | Strong evidence                                                           | 3D epitope>93%                           |
|                  | Ara h 3    | Strong evidence                                                           | 3D epitope>93%                           |
|                  | Ara h 3    | Strong evidence                                                           | 3D epitope>93%                           |
|                  | Ara h 5    | Strong evidence                                                           | 3D epitope>93%                           |
|                  | Ara h 6    | Strong evidence                                                           | 3D epitope>93%                           |
|                  | Ara h 7    | Strong evidence                                                           | 3D epitope>93%                           |
|                  | Ara h 8    | Strong evidence                                                           | 3D epitope>93%                           |
|                  | Ara h 9    | Strong evidence                                                           | 3D epitope>93%                           |
|                  | Ara h 10   | Strong evidence                                                           | win80lin >35%                            |
|                  | Ara h 11   | Strong evidence                                                           | win80lin >35%                            |
|                  | Ara h 12   | Strong evidence                                                           | 6-mer x3 nolcr                           |
|                  | Ara h 13   | Strong evidence                                                           | 6-mer x3 nolcr                           |
|                  | Ara h 14   | Strong evidence                                                           | win80lin >35%                            |
|                  | Ara h 15   | Strong evidence                                                           | win80lin >35%                            |
|                  | Ara h 16   | Strong evidence                                                           | 6-mer x3 nolcr and 3D epitope>93%        |
|                  | Ara h 17   | Strong evidence                                                           | 3D epitope>93%                           |
| Gallus gallus    | Gal d 1    | Strong evidence                                                           | win80lin >35%                            |
|                  | Unknown    | Strong evidence                                                           | 3D epitope>93%                           |
|                  | Gal d 3    | Strong evidence                                                           | 3D epitope>93%                           |
|                  | Unknown    | Strong evidence                                                           | 3D epitope>93%                           |
|                  | Gal d 5    | Strong evidence                                                           | 3D epitope>93%                           |
|                  | Gal d 6    | Strong evidence                                                           | 3D epitope>93%                           |
|                  | Gal d 7    | Strong evidence                                                           | 3D epitope>93%                           |
|                  | Gal d 8    | Strong evidence                                                           | 3D epitope>93%                           |
|                  | Gal d 9    | Strong evidence                                                           | 3D epitope>93%                           |
|                  | Bos taurus | Bos d 2                                                                   | Strong evidence                          |
| Bos d 3          |            | Strong evidence                                                           | 3D epitope>93%                           |
| Bos d 4          |            | Strong evidence                                                           | 3D epitope>93%                           |
| Bos d 5          |            | Strong evidence                                                           | 3D epitope>93%                           |
| Bos d 6          |            | Strong evidence                                                           | 3D epitope>93%                           |
| Bos d 9          |            | Strong evidence                                                           | win80lin >35%                            |
| Bos d 10         |            | Strong evidence                                                           | win80lin >35%                            |
| Casein           |            | Strong evidence                                                           | win80lin >35%                            |
| Bos d 8          |            | Strong evidence                                                           | win80lin >35%                            |
| Bos d 13         |            | Strong evidence                                                           | 3D epitope>93%                           |
| Glycine max      | Gly m 1    | Strong evidence                                                           | 6-mer x3 nolcr and 3D epitope>93%        |
|                  | Gly m 3    | Strong evidence                                                           | 3D epitope>93%                           |
|                  | Gly m 4    | Strong evidence                                                           | 3D epitope>93%                           |
|                  | Gly m 5    | Strong evidence                                                           | Gluten-like Q-repeats and 3D epitope>93% |
|                  | Gly m 6    | Strong evidence                                                           | Gluten-like Q-repeats and 3D epitope>93% |
|                  | Gly m 7    | Strong evidence                                                           | win80lin >35%                            |
|                  | Gly m 8    | Strong evidence                                                           | 3D epitope>93%                           |

3D epitope>93%: identity of aligned 3D surface residues is >93%; win80lin >35%: protein sequence is > 35% identical to allergens over 80 residue window; 6-mer x3 nolcr: protein sequence has 3 x6 mers identical to allergens; Gluten-like Q-repeats: This is the number of identified Gluten-like Q repeats based on a 9 amino acid window log-odd score of the composition fingerprint from the Food Allergy Research and Resource Program Celiac Disease peptide library.
